# Supplementary material for: Dexamethasone intravitreal implant in treatment-naïve diabetic macular oedema: findings from the prospective, multicentre, AUSSIEDEX study
Source: HighWire-hosted journal article supplement (doi:10.1136/bjophthalmol-2021-319070), 2021-08-25
Supplement: bjophthalmol-2021-319070supp003_data_supplement.pdf [file bjophthalmol-2021-319070supp003_data_supplement.pdf]

**Supplementary Table 3.** Changes in mean BCVA and CRT from baseline over time in pseudophakic, treatment-naïve patients (n=39)

| Visit         | Mean BCVA (SD),<br>letters | Change in<br>mean BCVA<br>(SD) from<br>baseline,<br>letters | p<br>value | Mean CRT<br>(SD),<br>µm | Change in<br>mean CRT<br>(SD) from<br>baseline, µm | p<br>value |
|---------------|----------------------------|-------------------------------------------------------------|------------|-------------------------|----------------------------------------------------|------------|
| Baseline<br>n | 58.6 (17.7)<br>39          | –                                                           | –          | 416.9 (100.8)<br>39     | –                                                  | –          |
| Week 6<br>n   | 63.7 (18.8)<br>29          | +3.6 (8.9)                                                  | 0.041      | 321.2 (60.2)<br>32      | –85.4 (62.5)                                       | <0.001     |
| Week 16<br>n  | 60.3 (19.3)<br>34          | +3.2 (8.8)                                                  | 0.044      | 366.1 (89.1)<br>34      | –54.2 (78.8)                                       | <0.001     |
| Week 24<br>n  | 58.2 (18.5)<br>23          | +1.6 (11.8)                                                 | 0.521      | 360.5 (98.6)<br>26      | –71.5 (99.3)                                       | 0.001      |
| Week 52<br>n  | 65.3 (16.7)<br>29          | +4.1 (11.3)                                                 | 0.063      | 336.7 (94.8)<br>29      | –91.5 (115.0)                                      | <0.001     |

BCVA, best-corrected visual acuity; CRT, central retinal thickness; SD, standard deviation.
